# Supplementary material
Source: publisher site journal article supplement (https://www.spandidos-publications.com/8333/downloadSupplementary)
Supplement: Supplementary file 1 [file downloadSupplementary]

## Sheet: Table SIII
Table SIII. Results of NOS quality assessment.
Title	Catergory	NOS criteria	Stars awarded	Justification
Differential diagnosis of osteoblastic metastases from bone islands in patients with lung cancer by single-source dual-energy CT: Advantages of spectral CT imaging	Selection (Max 4 stars)	1. Representativeness of the exposed cohort	★★	Retrospective single-center study; clear inclusion/exclusion criteria.
		2. Selection of the non-exposed cohort	★★	Included bone islands (BIs) as controls (43 lesions).
		3. Ascertainment of exposure (spectral CT imaging)	★★★	Rigorous quantitative analysis (CT values, SD, spectral curves).
		4. Demonstration that outcome of interest was not present at start of study	★★	Follow-up confirmed diagnosis, but retrospective design limits baseline certainty.
	Comparability (Max 2 stars)	1. Comparability of cohorts based on design or analysis	★★	Matched by lesion size (<2 cm); no significant differences in patient demographics.
	Outcome (Max 3 stars)	1. Assessment of outcome (differentiation accuracy)	★★★	Comprehensive metrics (AUC: 0.972, sensitivity: 93.0%, specificity: 93.3%).
		2. Follow-up long enough for outcomes to occur	★★	Follow-up ≥6 months with bone scintigraphy/PET-CT.
		3. Adequacy of follow-up of cohorts	★★	Consistent follow-up protocol.
	Total Score		8.9	High-quality study with robust methodology, limited by retrospective design.
Deep neural network based artificial intelligence assisted diagnosis of bone scintigraphy for cancer bone metastasis	Selection (Max 4)	1. Representativeness of the exposed cohort	★★★★	Retrospective study with 12,222 cases from West China Hospital. Clear inclusion/exclusion criteria applied.
		2. Selection of the non-exposed cohort (controls)	★★★★	Balanced dataset with metastatic (Grade 2/3) and non-metastatic (Grade 0/1) cases. Subgroup analysis by cancer type.
		3. Ascertainment of exposure (AI model training & validation)	★★★★	Rigorous methodology using multi-input CNN with ResNet-50. Training (9,776), validation (1,223), and testing (1,223) cohorts with similar metastasis rates.
		4. Demonstration that outcome was not present at baseline	★★	Follow-up scans and clinical records confirmed diagnosis. Retrospective design limits baseline certainty.
	Comparability (Max 2)	1. Comparability of cohorts based on design/analysis	★★	Stratified by cancer type, age, and gender. No significant differences in metastasis rates between cohorts.
	Outcome (Max 3)	1. Assessment of outcome (diagnostic accuracy)	★★★	Comprehensive metrics (AUC: 0.964 overall, 0.988 for breast cancer). Blinded human vs. AI comparison.
		2. Follow-up long enough for outcomes to occur	★★	Follow-up scans and clinical records used for confirmation (timeframe not explicitly stated).
		3. Adequacy of follow-up of cohorts	★★	Consistent follow-up protocol, but retrospective design may have incomplete records.
	Total Score		9.9	High-quality study with robust methodology, large dataset, and rigorous validation.
Automatic identification of suspicious bone metastatic lesions in bone scintigraphy using convolutional neural network	Selection (Max 4)	1. Representativeness of the exposed cohort	★★★★	Retrospective study with 3,352 patients and 14,972 lesions from West China Hospital. Clear inclusion/exclusion criteria applied.
		2. Selection of the non-exposed cohort (controls)	★★★★	Balanced dataset with malignant (51.23%) and benign (48.77%) lesions. Subgroup analysis by cancer type (lung, prostate, breast).
		3. Ascertainment of exposure (AI model training & validation)	★★★★	Rigorous methodology: ResNet50-based CNN with fivefold cross-validation. Compared with InceptionV3, VGG16, and DenseNet169.
		4. Demonstration that outcome was not present at baseline	★★	Follow-up scans and clinical records (CT/MRI/PET-CT) confirmed diagnosis. Retrospective design limits baseline certainty.
	Comparability (Max 2)	1. Comparability of cohorts based on design/analysis	★★	Stratified by lesion burden (few/medium/extensive) and primary tumor type. No significant differences in metastasis rates between cohorts.
	Outcome (Max 3)	1. Assessment of outcome (diagnostic accuracy)	★★★	Comprehensive metrics (AUC: 0.847–0.900, sensitivity: 81.30%, specificity: 81.14%). Blinded fivefold cross-validation.
		2. Follow-up long enough for outcomes to occur	★★	Follow-up scans and clinical records used for confirmation (timeframe not explicitly stated).
		3. Adequacy of follow-up of cohorts	★★	Consistent follow-up protocol but retrospective; potential for incomplete records.
	Total Score		9.9	High-quality study with robust methodology, large dataset, and rigorous validation.
Deep learning-based algorithm improves radiologists’ performance in lung cancer bone metastases detection on computed tomography	Selection (Max 4 stars)	1. Representativeness of the exposed cohort	★	Single-center retrospective study; may not fully represent broader populations.
		2. Selection of the non-exposed cohort	★	Negative samples (without bone metastases) were included but from the same institution.
		3. Ascertainment of exposure (CT scans with bone metastases)	★★	Pathologically confirmed bone metastases and manual annotations by radiologists.
		4. Demonstration that outcome of interest was not present at start of study	★	Study focuses on diagnostic performance, not longitudinal outcomes.
	Comparability (Max 2 stars)	1. Comparability of cohorts based on design or analysis	★★	Cohorts (training, validation, testing) were randomly split with no significant differences in age/sex.
	Outcome (Max 3 stars)	1. Assessment of outcome (detection/segmentation performance)	★★★	Robust metrics (sensitivity, dice coefficient, IoU) and comparison with radiologists.
		2. Follow-up long enough for outcomes to occur	N/A	Not applicable (diagnostic study, no follow-up).
		3. Adequacy of follow-up of cohorts	N/A	Not applicable.
	Total Score		7.9
CT-based radiomics and clinical characteristics for predicting bone metastasis in lung adenocarcinoma patients	Selection (Max 4 stars)	1. Representativeness of the exposed cohort	★★	Single-center retrospective study; excluded synchronous BM, but cohort was randomly split.
		2. Selection of the non-exposed cohort	★★	Negative samples (without BM) included, matched by clinical factors.
		3. Ascertainment of exposure (CT radiomics/clinical features)	★★★	Rigorous feature extraction (1,130 radiomics features) and clinical data collection.
		4. Demonstration that outcome of interest was not present at start of study	★★★	Excluded patients with baseline BM; follow-up confirmed BM occurrence.
	Comparability (Max 2 stars)	1. Comparability of cohorts based on design or analysis	★★	Balanced training/validation cohorts (7:3 ratio); no significant differences in baseline characteristics.
	Outcome (Max 3 stars)	1. Assessment of outcome (BM prediction)	★★★	Robust metrics (AUC, sensitivity, specificity) and model validation (DeLong test, DCA).
		2. Follow-up long enough for outcomes to occur	★★	Median follow-up of 58 months (range: 2–76 months).
		3. Adequacy of follow-up of cohorts	★★	Regular follow-up (every 6 months for 2 years, then annually).
	Total Score		8.9	High-quality study with clear methodology and validation, limited by retrospective design and single-center data.
Automated Diagnosis of Bone Metastasis by Classifying Bone Scintigrams Using a Self-defined Deep Learning Model	Selection (Max 4 stars)	1. Representativeness of the exposed cohort	★★	Retrospective single-center study; clear inclusion/exclusion criteria.
		2. Selection of the non-exposed cohort	★★	NonMet group included (260 patients without BM).
		3. Ascertainment of exposure (SPECT imaging and CNN model)	★★★	Rigorous preprocessing (bladder removal, view fusion) and feature extraction.
		4. Demonstration that outcome of interest was not present at start of study	★★	Follow-up confirmed BM status, but retrospective design limits baseline certainty.
	Comparability (Max 2 stars)	1. Comparability of cohorts based on design or analysis	★★	Balanced training/test sets (70%/30%); no significant baseline differences reported.
	Outcome (Max 3 stars)	1. Assessment of outcome (BM classification performance)	★★★	Comprehensive metrics (AUC: 0.8489, accuracy: 0.8038, etc.) and ROC analysis.
		2. Follow-up long enough for outcomes to occur	★	Limited follow-up details; retrospective reliance on historical data.
		3. Adequacy of follow-up of cohorts	★	No explicit follow-up protocol described beyond initial diagnosis.
	Total Score		7.9	Strong methodology but limited by retrospective design and lack of prospective validation.
NOS: Newcastle–Ottawa Scale; BM: bone metastasis; CT: computed tomography; MRI: magnetic resonance imaging; PET‑CT: positron emission tomography–computed tomography; AI: artificial intelligence; CNN: convolutional neural network; ResNet‑50: 50‑layer Residual Network; AUC: area under the receiver operating characteristic curve; DCA: decision curve analysis; IoU: Intersection‑over‑Union; Stars (★):…
